# Supplementary material for: Qualitative and Quantitative Analysis of Major Triterpenoids in Alismatis Rhizoma by High Performance Liquid Chromatography/Diode-Array Detector/Quadrupole-Time-of-Flight Mass Spectrometry and Ultra-Performance Liquid Chromatography/Triple Quadrupole Mass Spectrometry
Source: PubMed Central journal article supplement (PMC6331801; doi:10.3390/molecules200813958), 2015-07-31
Supplement: molecules-20-13958-s001.pdf [file molecules-20-13958-s001.pdf]

# Supplementary Material

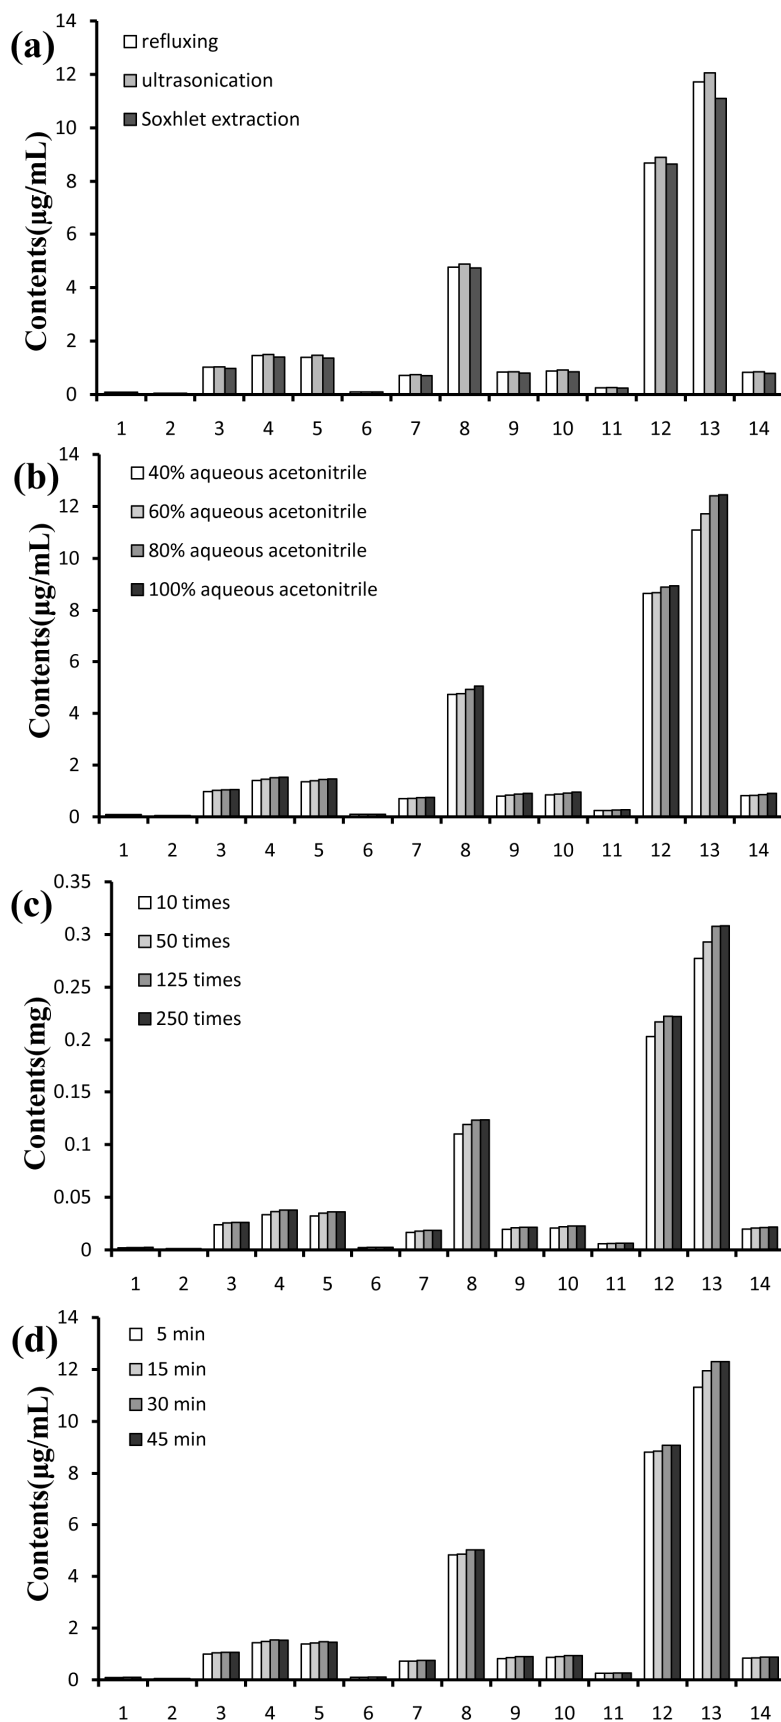

**Figure S1.** Extraction efficiencies of the typical compounds 1–14 by different extract methods (a); different extraction solvents (b); different times the volume of 100% acetonitrile (c); and different extraction time (d).

Table S1. Typical DAD spectra from 200 nm to 400 nm for 25 compounds.

| NO. | $t_R$ (min) | Molecular Formula | Characteristic Skeleton                                                             | DAD Spectra                                                                          | $\lambda_{max}$ (nm) |
|-----|-------------|-------------------|-------------------------------------------------------------------------------------|--------------------------------------------------------------------------------------|----------------------|
| 6   | 19.36       | $C_{30}H_{46}O_5$ | 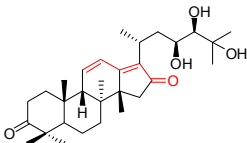   |    | 287                  |
| 14  | 25.91       | $C_{30}H_{44}O_4$ |    |    | 287                  |
| 20  | 35.87       | $C_{32}H_{46}O_5$ |    |    | 287                  |
| 1   | 11.81       | $C_{30}H_{48}O_6$ |    |   | 245                  |
| 2   | 13.19       | $C_{32}H_{50}O_7$ |  |  | 245                  |
| 3   | 15.63       | $C_{32}H_{50}O_7$ |  |  | 245                  |
| 5   | 17.31       | $C_{30}H_{46}O_5$ |  |  | 245                  |
| 11  | 24.33       | $C_{32}H_{48}O_6$ |  |  | 245                  |
| 16  | 27.75       | $C_{30}H_{50}O_5$ |  |  | -                    |

Table S1. *Cont.*

| NO. | t <sub>R</sub> (min) | Molecular Formula                              | Characteristic Skeleton                                                             | DAD Spectra                                                                          | λ <sub>max</sub> (nm) |
|-----|----------------------|------------------------------------------------|-------------------------------------------------------------------------------------|--------------------------------------------------------------------------------------|-----------------------|
| 17  | 29.07                | C <sub>32</sub> H <sub>52</sub> O <sub>6</sub> | 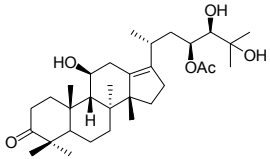   |    | -                     |
| 18  | 33.90                | C <sub>32</sub> H <sub>52</sub> O <sub>6</sub> |    |    | -                     |
| 21  | 38.87                | C <sub>30</sub> H <sub>48</sub> O <sub>4</sub> |    |    | -                     |
| 22  | 40.71                | C <sub>30</sub> H <sub>48</sub> O <sub>4</sub> |   |   | -                     |
| 23  | 49.06                | C <sub>32</sub> H <sub>50</sub> O <sub>5</sub> |  |  | -                     |
| 9   | 23.30                | C <sub>30</sub> H <sub>46</sub> O <sub>4</sub> |  |  | -                     |
| 10  | 23.37                | C <sub>30</sub> H <sub>48</sub> O <sub>5</sub> |  |  | -                     |
| 15  | 27.00                | C <sub>32</sub> H <sub>50</sub> O <sub>6</sub> |  |  | -                     |
| 24  | 54.55                | C <sub>30</sub> H <sub>48</sub> O <sub>3</sub> |  |  | -                     |

Table S1. Cont.

| NO. | t <sub>R</sub> (min) | Molecular Formula                              | Characteristic Skeleton                                                             | DAD Spectra                                                                          | λ <sub>max</sub> (nm) |
|-----|----------------------|------------------------------------------------|-------------------------------------------------------------------------------------|--------------------------------------------------------------------------------------|-----------------------|
| 25  | 61.12                | C <sub>32</sub> H <sub>50</sub> O <sub>4</sub> | 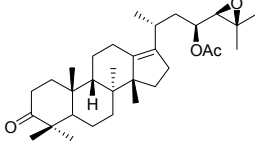   |    | -                     |
| 4   | 16.70                | C <sub>30</sub> H <sub>50</sub> O <sub>6</sub> |    |    | -                     |
| 8   | 21.46                | C <sub>32</sub> H <sub>52</sub> O <sub>7</sub> |    |    | -                     |
| 12  | 24.75                | C <sub>30</sub> H <sub>48</sub> O <sub>5</sub> |   |   | -                     |
| 19  | 34.95                | C <sub>32</sub> H <sub>50</sub> O <sub>6</sub> |  |  | -                     |
| 7   | 19.72                | C <sub>30</sub> H <sub>48</sub> O <sub>5</sub> |  |  | 245                   |
| 13  | 25.46                | C <sub>30</sub> H <sub>46</sub> O <sub>4</sub> |  |  | 245                   |

-: maximum UV absorption is below 200 nm.

**Table S2.**  $^1\text{H}$ - and  $^{13}\text{C}$ -NMR data for compound **7** (16-oxo-11-deoxy-alisol A) in  $\text{CDCl}_3$  ( $\delta$  in ppm,  $J$  in Hz).

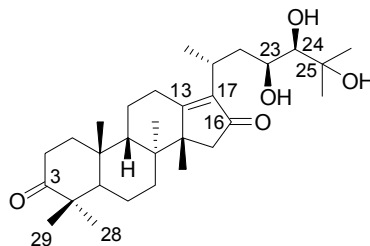

| Position | 11-deoxy-alisol A [1] |                     | 16-oxo-11-deoxy-alisol A |                     |               |
|----------|-----------------------|---------------------|--------------------------|---------------------|---------------|
|          | $\delta_{\text{H}}$   | $\delta_{\text{C}}$ | $\delta_{\text{H}}$      | $\delta_{\text{C}}$ | DEPT          |
| 1        |                       | 31.2                |                          | 31.74 t             | $\text{CH}_2$ |
| 2        |                       | 34.3                |                          | 34.53 t             | $\text{CH}_2$ |
| 3        |                       | 219.2               |                          | 219.31 s            | C             |
| 4        |                       | 47.1                |                          | 46.98 s             | C             |
| 5        |                       | 48.4                |                          | 48.05 d             | CH            |
| 6        |                       | 20.4                |                          | 19.97 t             | $\text{CH}_2$ |
| 7        |                       | 34.0                |                          | 33.58 t             | $\text{CH}_2$ |
| 8        |                       | 40.7                |                          | 40.51 s             | C             |
| 9        |                       | 44.2                |                          | 42.71 d             | CH            |
| 10       |                       | 36.5                |                          | 36.22 s             | C             |
| 11       |                       | 22.8                |                          | 22.17 t             | $\text{CH}_2$ |
| 12       |                       | 23.10               |                          | 24.99 t             | $\text{CH}_2$ |
| 13       |                       | 139.5               |                          | 180.40 s            | C             |
| 14       |                       | 57.50               |                          | 50.44 s             | C             |
| 15       |                       | 32.00               |                          | 45.43 t             | $\text{CH}_2$ |
| 16       |                       | 29.10               |                          | 209.96 s            | C             |
| 17       |                       | 134.2               |                          | 140.23 s            | C             |
| 18       |                       | 23.3                |                          | 23.35 q             | $\text{CH}_3$ |
| 19       |                       | 23.6                |                          | 23.67 q             | $\text{CH}_3$ |
| 20       |                       | 28.7                |                          | 26.98 d             | CH            |
| 21       |                       | 20.0                | 1.23(d,6.56)             | 19.51 q             | $\text{CH}_3$ |
| 22       |                       | 40.3                |                          | 40.29 t             | $\text{CH}_2$ |
| 23       | 3.80(dd,3.3,9.0)      | 69.7                | 3.63(d,10.5)             | 69.37 d             | CH            |
| 24       | 3.03(br s)            | 77.6                | 3.02(br s)               | 77.36 d             | CH            |
| 25       |                       | 74.0                |                          | 73.69 s             | C             |
| 26       |                       | 26.4                |                          | 25.47 q             | $\text{CH}_3$ |
| 27       |                       | 27.5                |                          | 26.34 q             | $\text{CH}_3$ |
| 28       |                       | 29.5                |                          | 29.25 q             | $\text{CH}_3$ |
| 29       |                       | 20.5                |                          | 19.69 q             | $\text{CH}_3$ |
| 30       |                       | 23.8                |                          | 22.02 q             | $\text{CH}_3$ |

[1] Nakajima Y, Satoh Y, Ida Y *et al.* Terpenoids of *Alisma orientale* rhizome and the crude drug *alismatis rhizoma*. *Phytochemistry* **1994**, 36, 119–127.

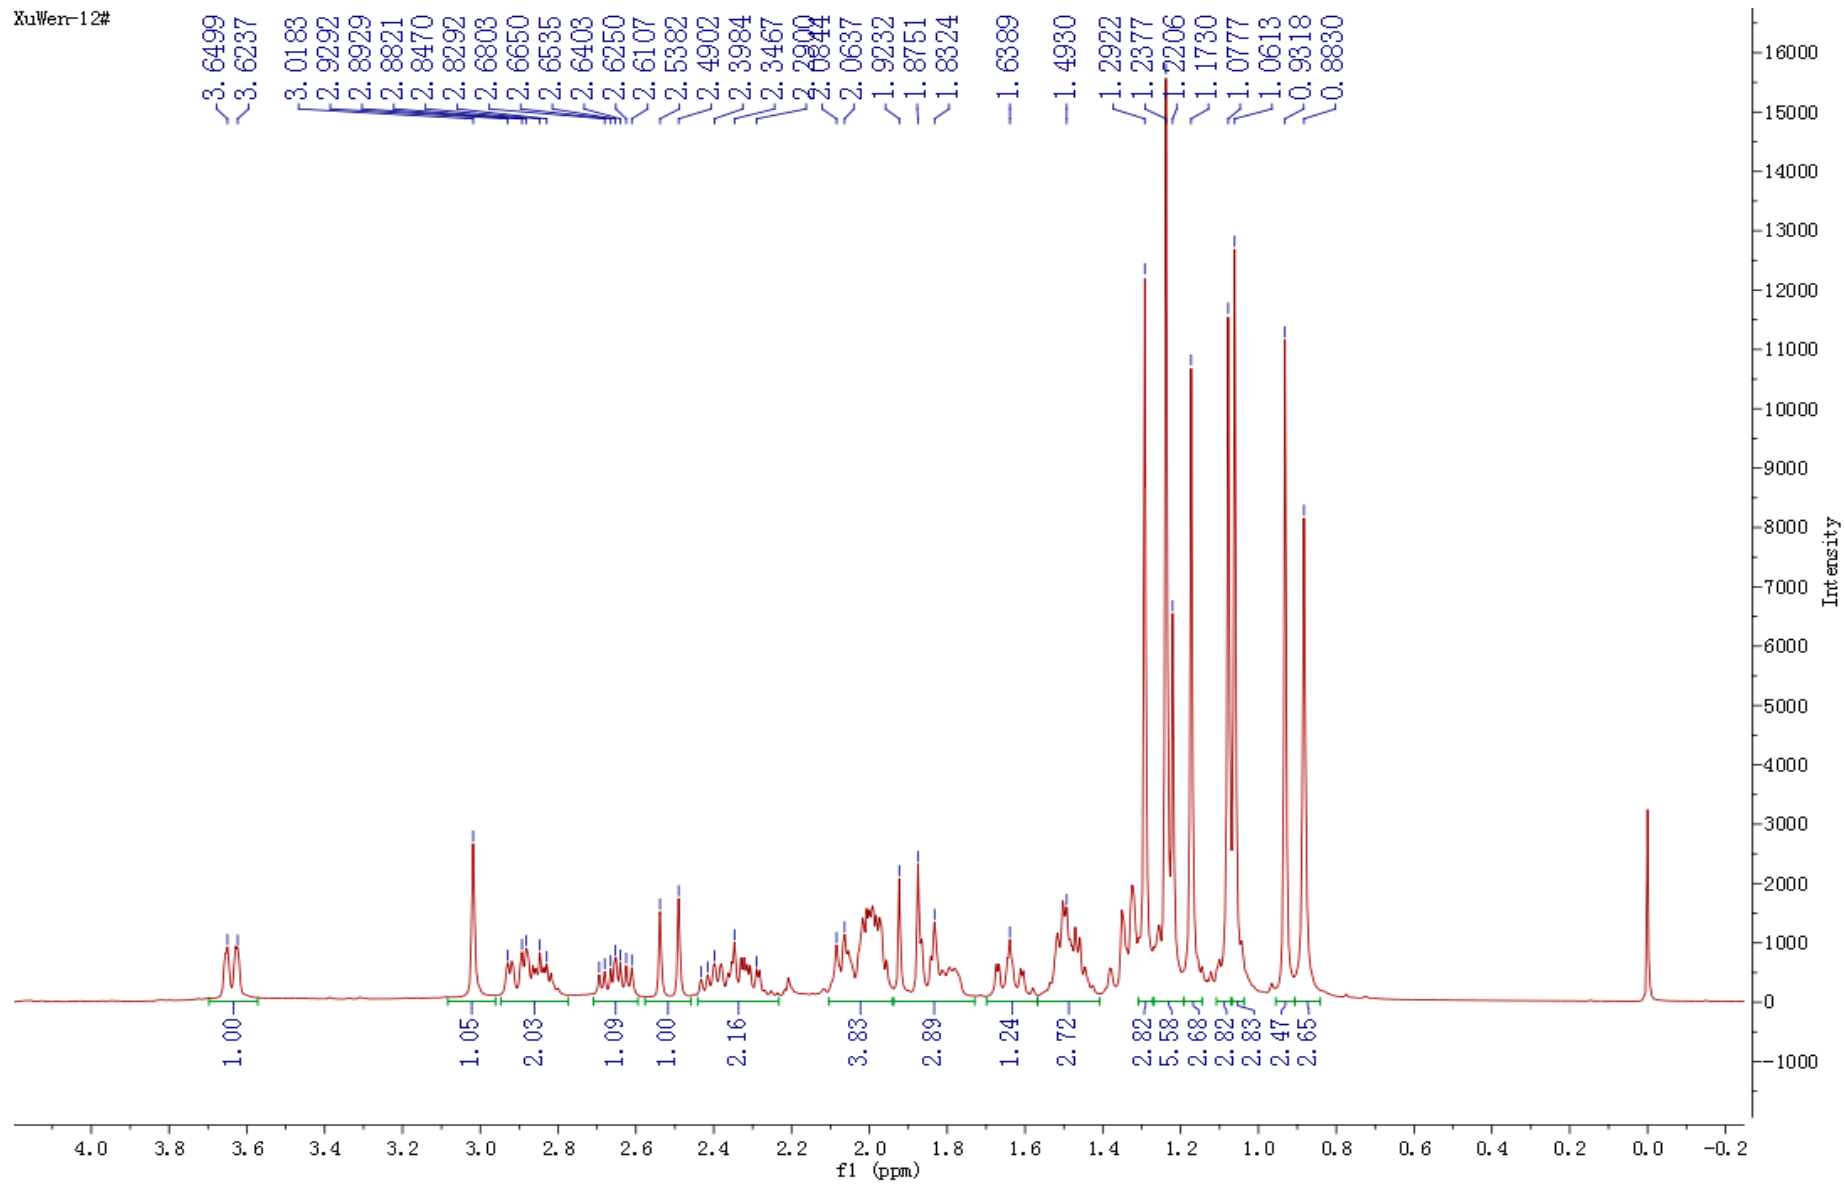

Figure S2.  $^1\text{H-NMR}$  of 16-oxo-11-deoxy-alisol A.

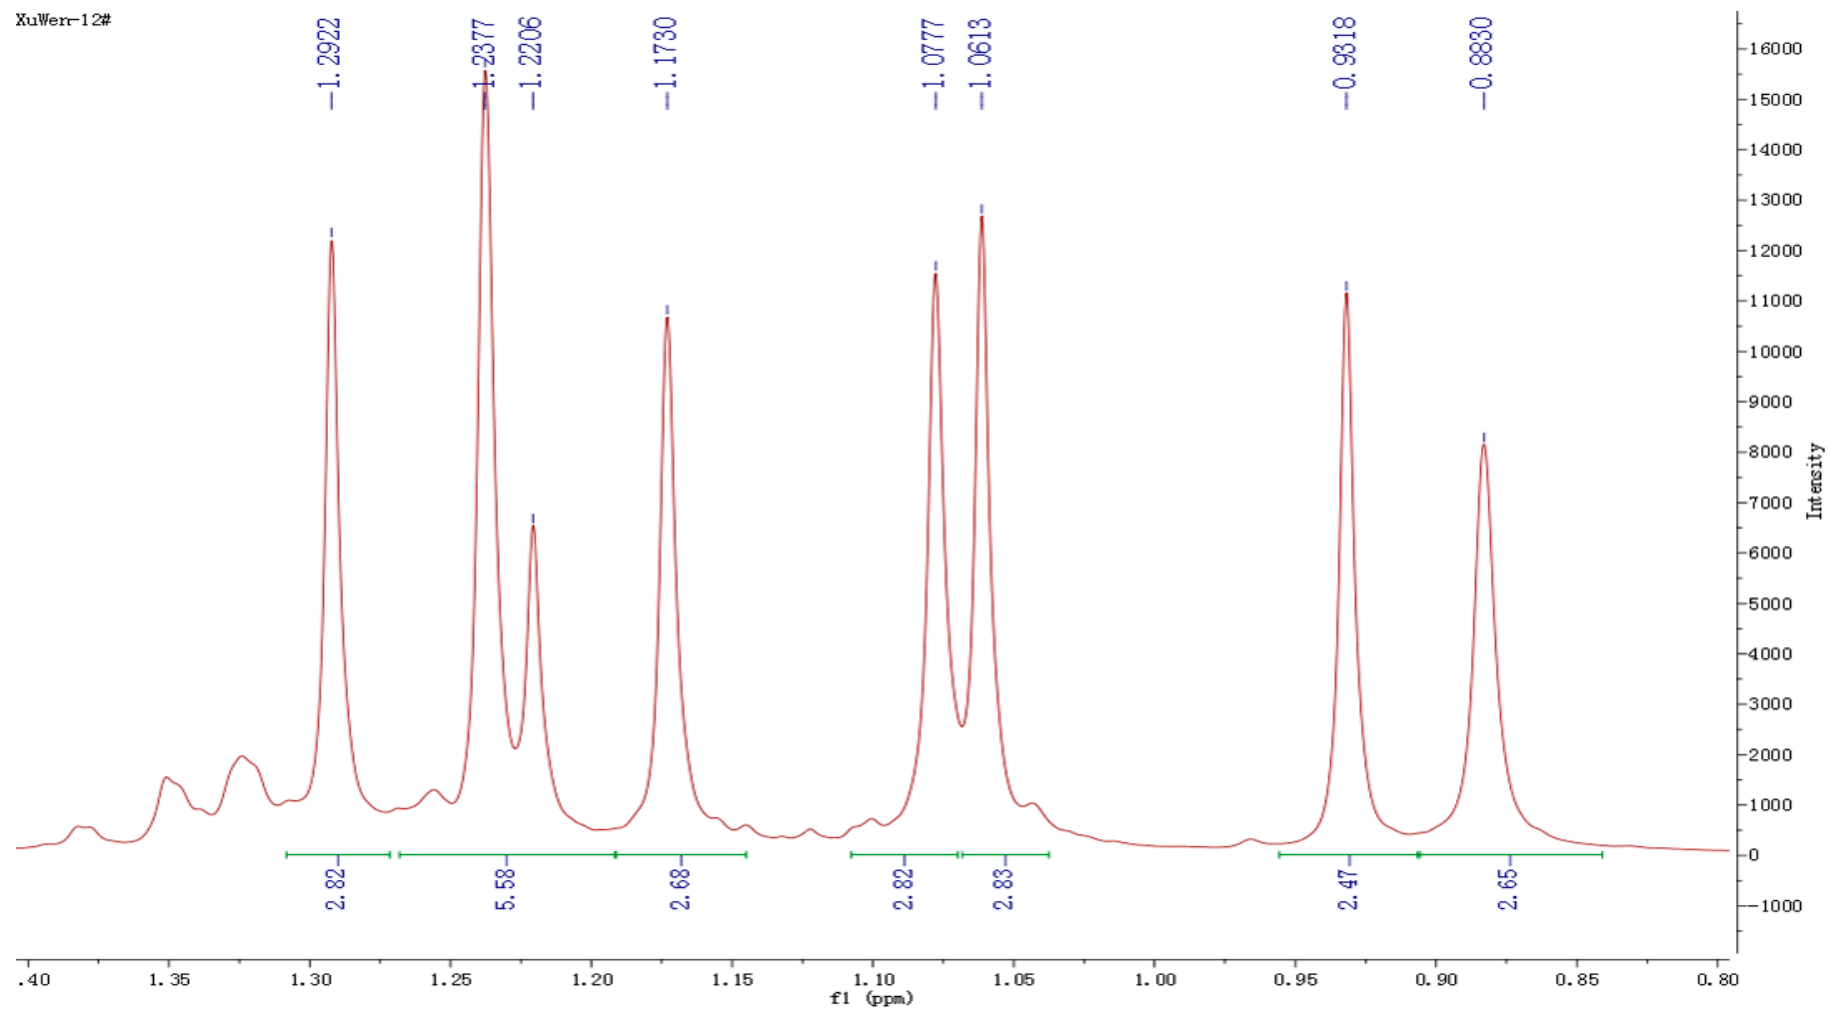

**Figure S3.**  $^1\text{H}$ -NMR of 16-oxo-11-deoxy-alisol A—Expansion.

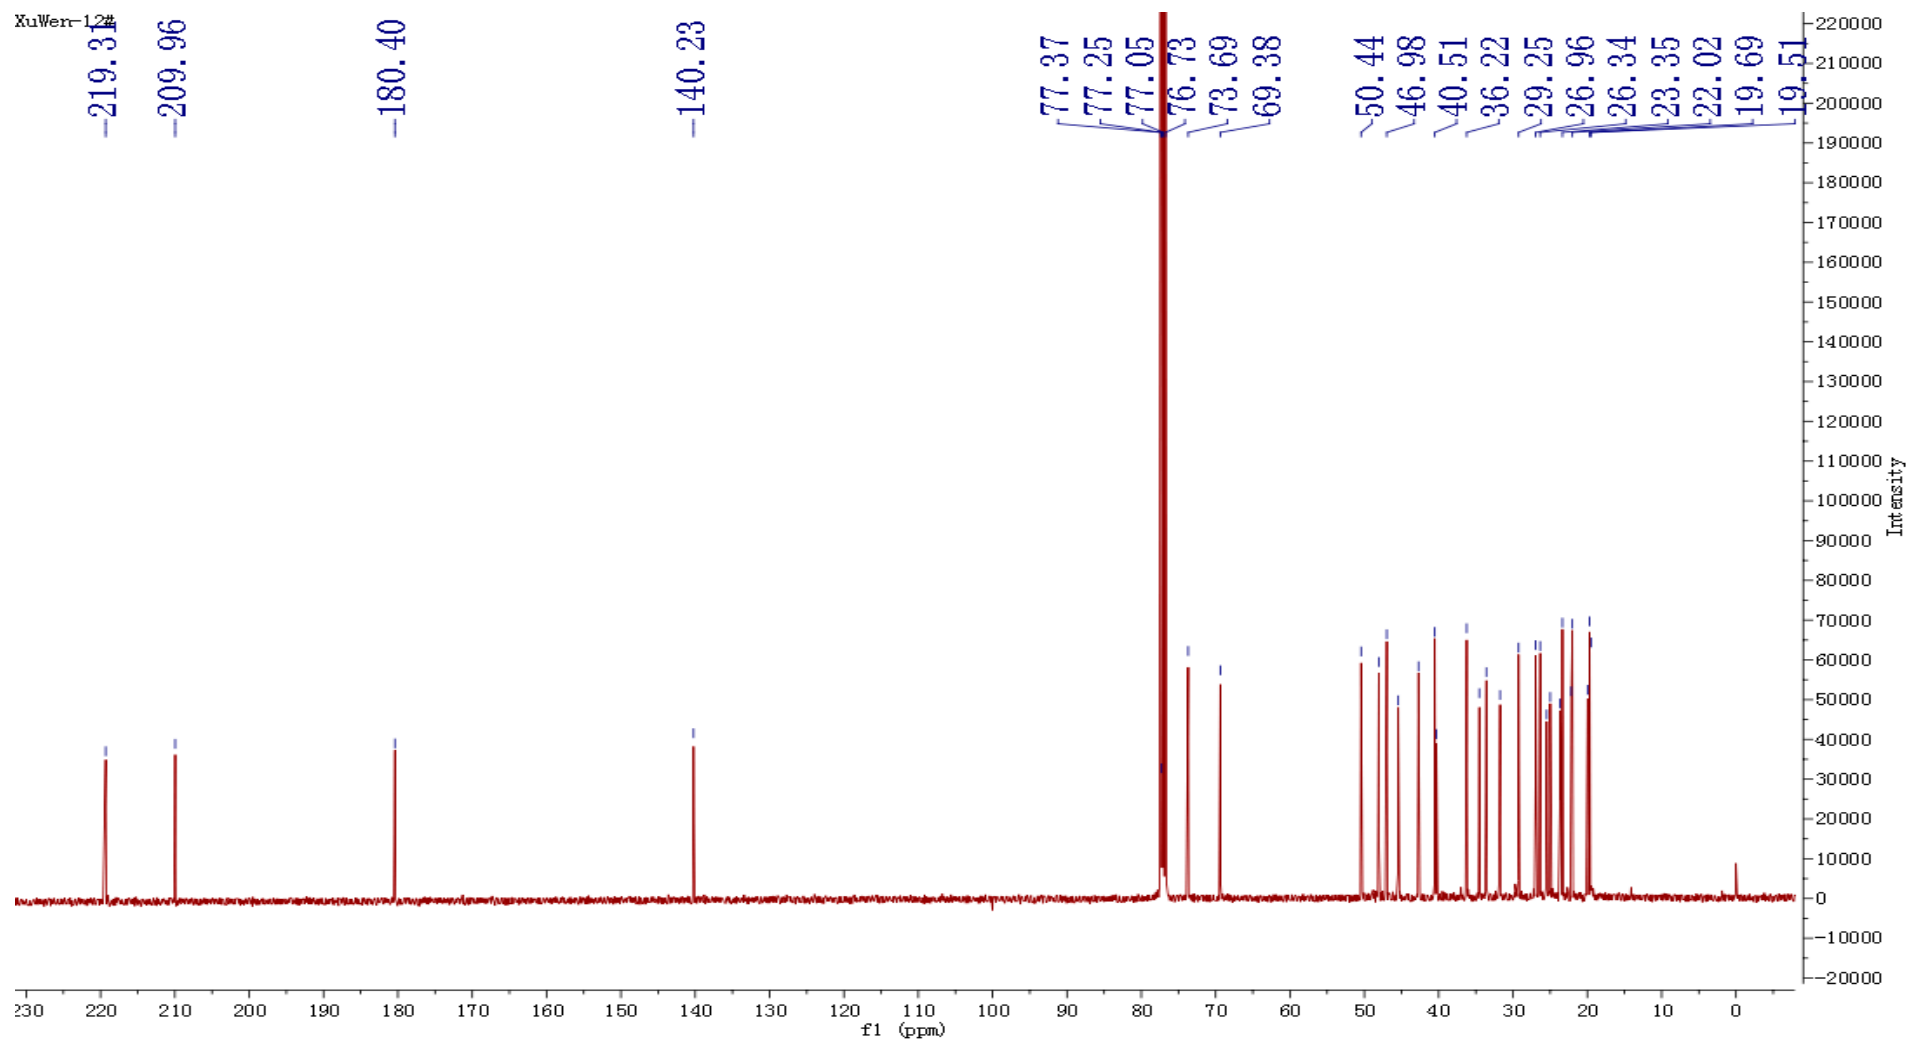

Figure S4.  $^{13}\text{C}$ -NMR of 16-oxo-11-deoxy-alisol A.



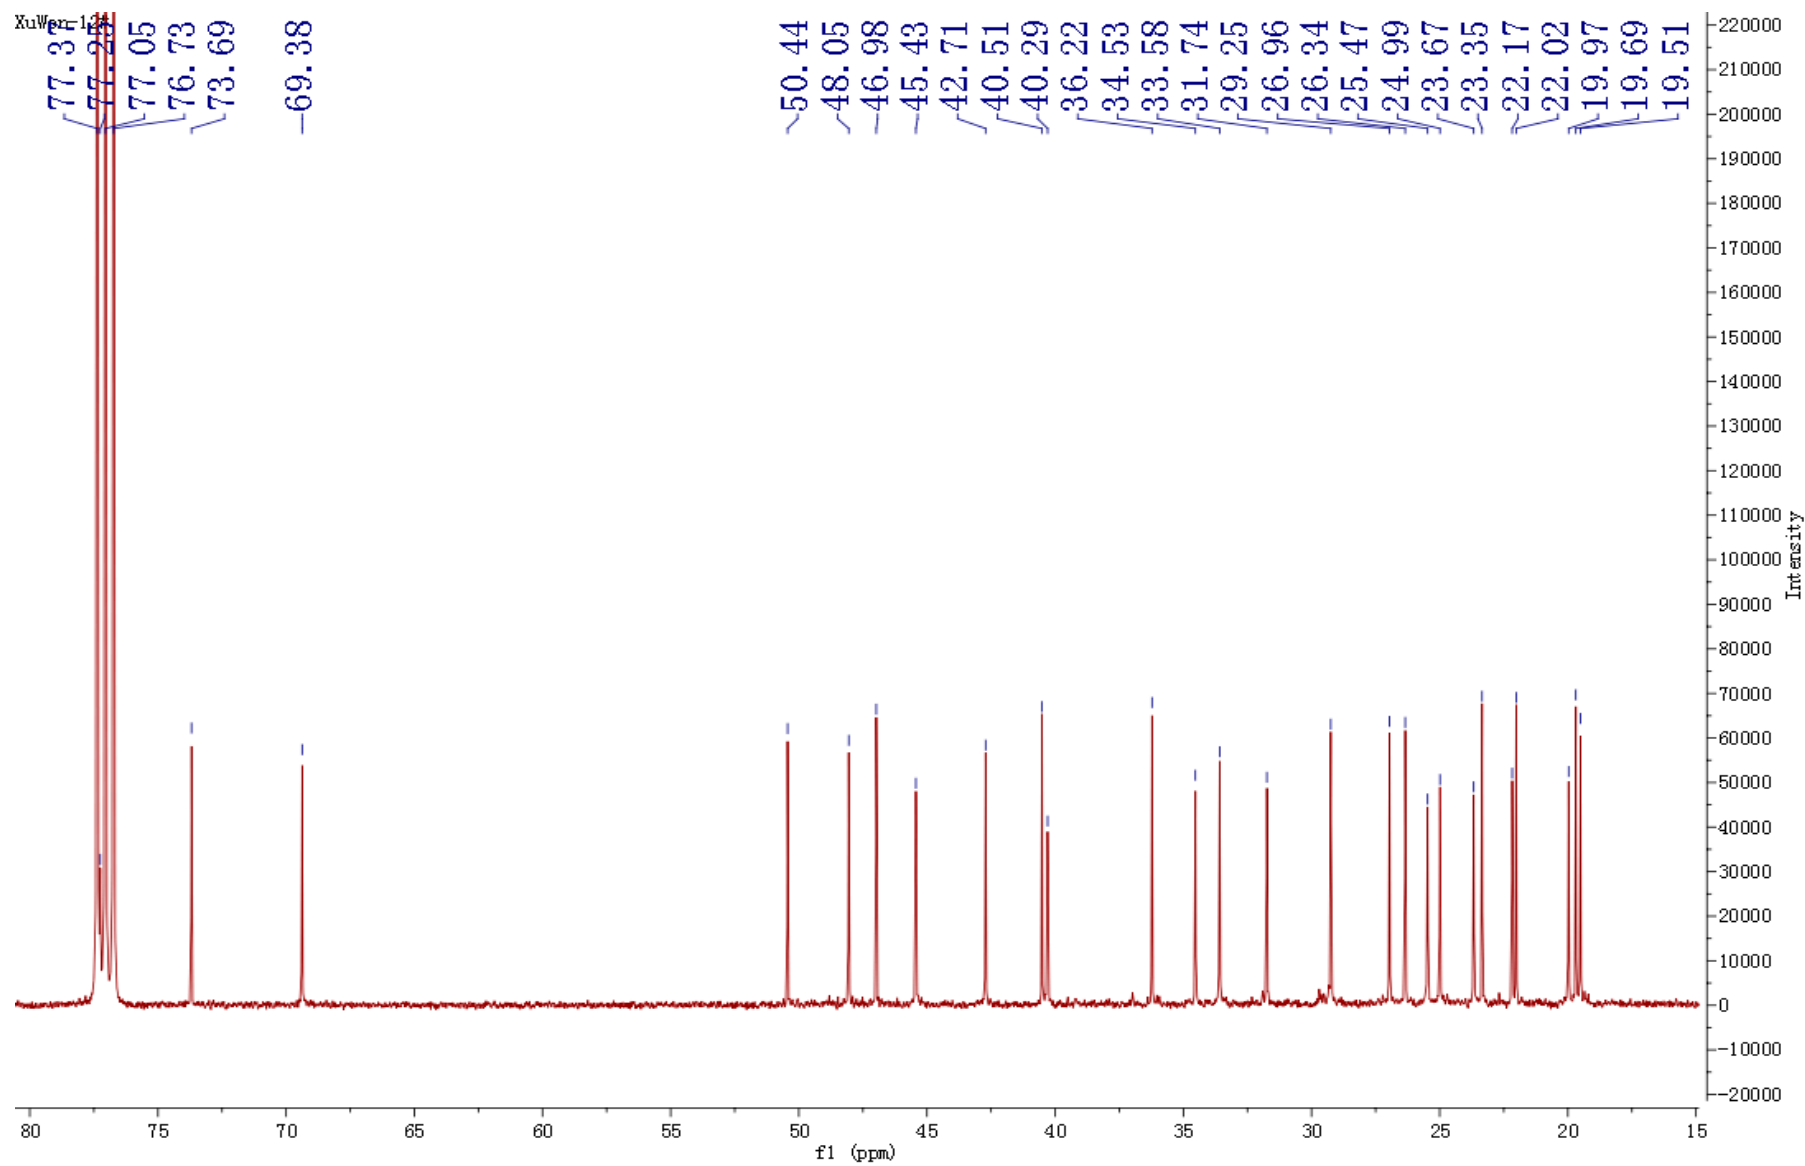

Figure S5.  $^{13}\text{C}$ -NMR of 16-oxo-11-deoxy-alisol A—Expansion.

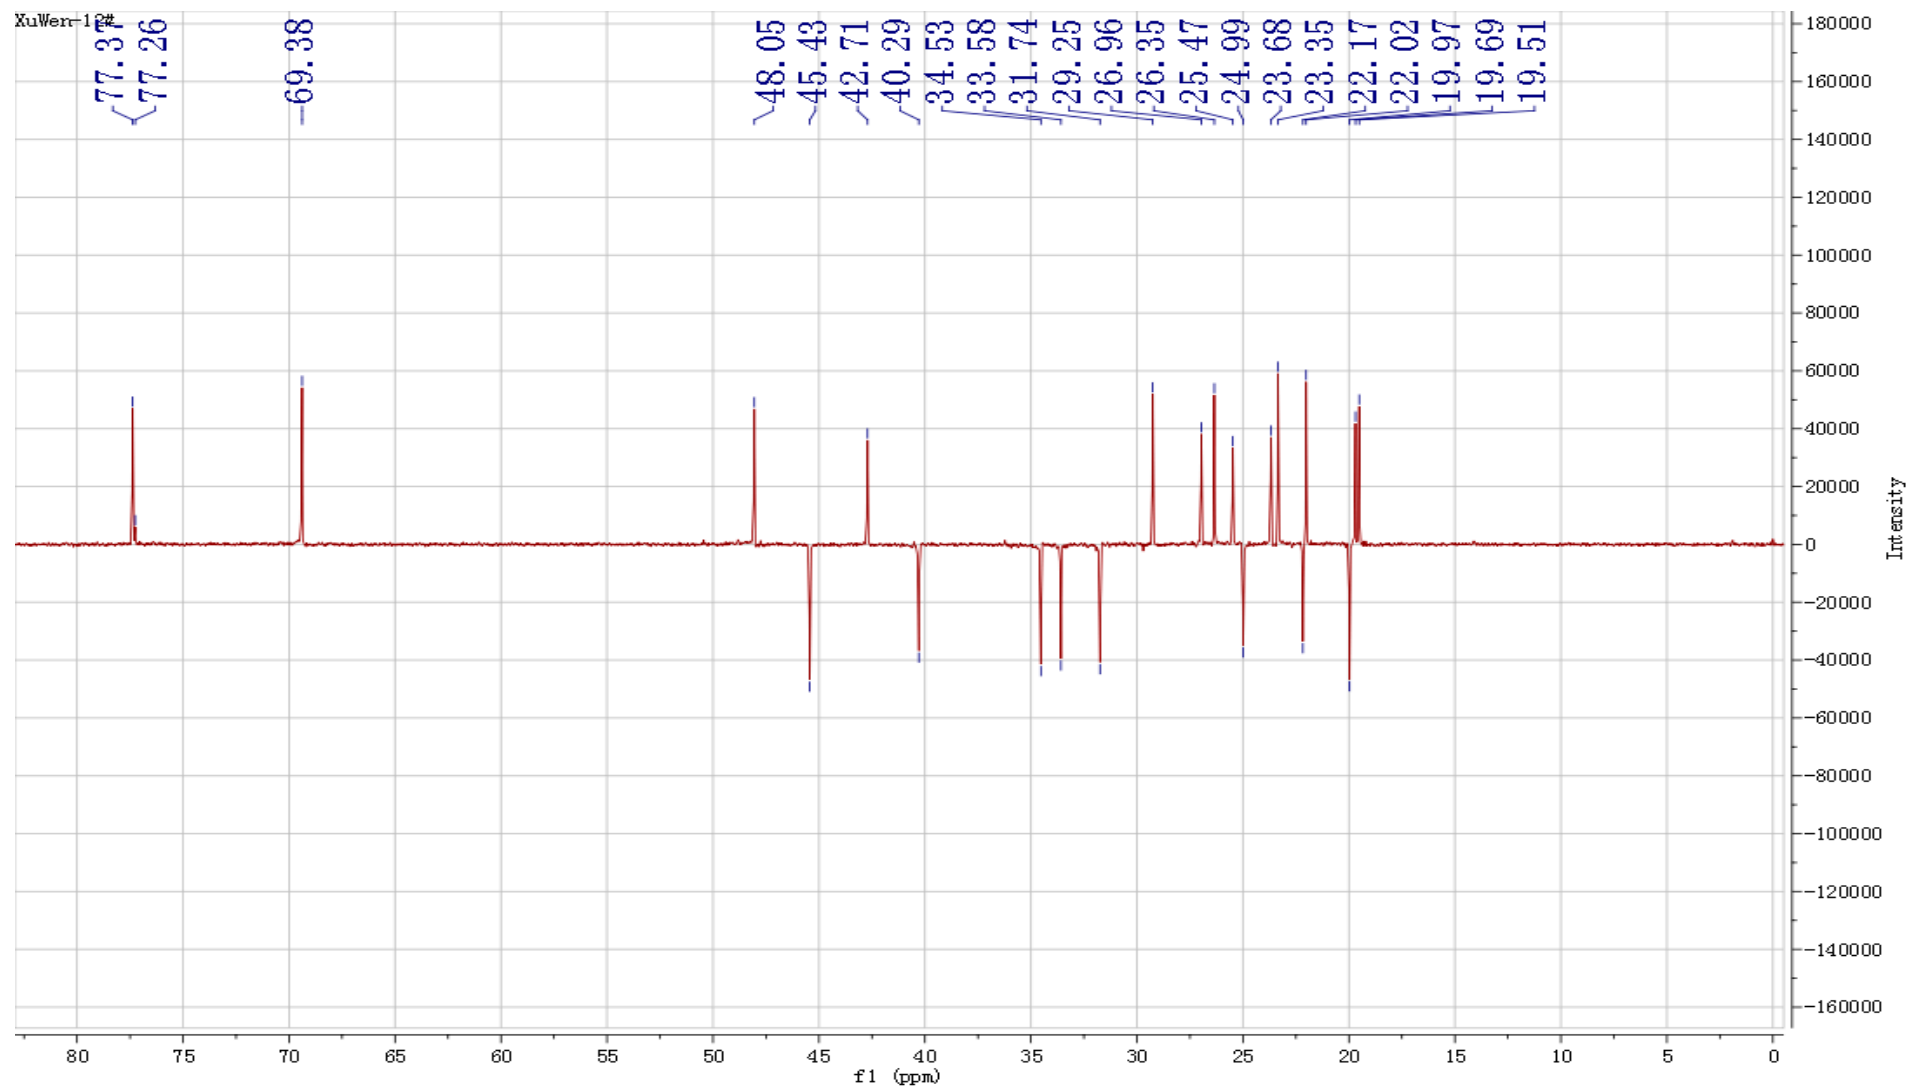

Figure S6.  $^{13}\text{C}$ -NMR DEPT of 16-oxo-11-deoxy-alisol A.

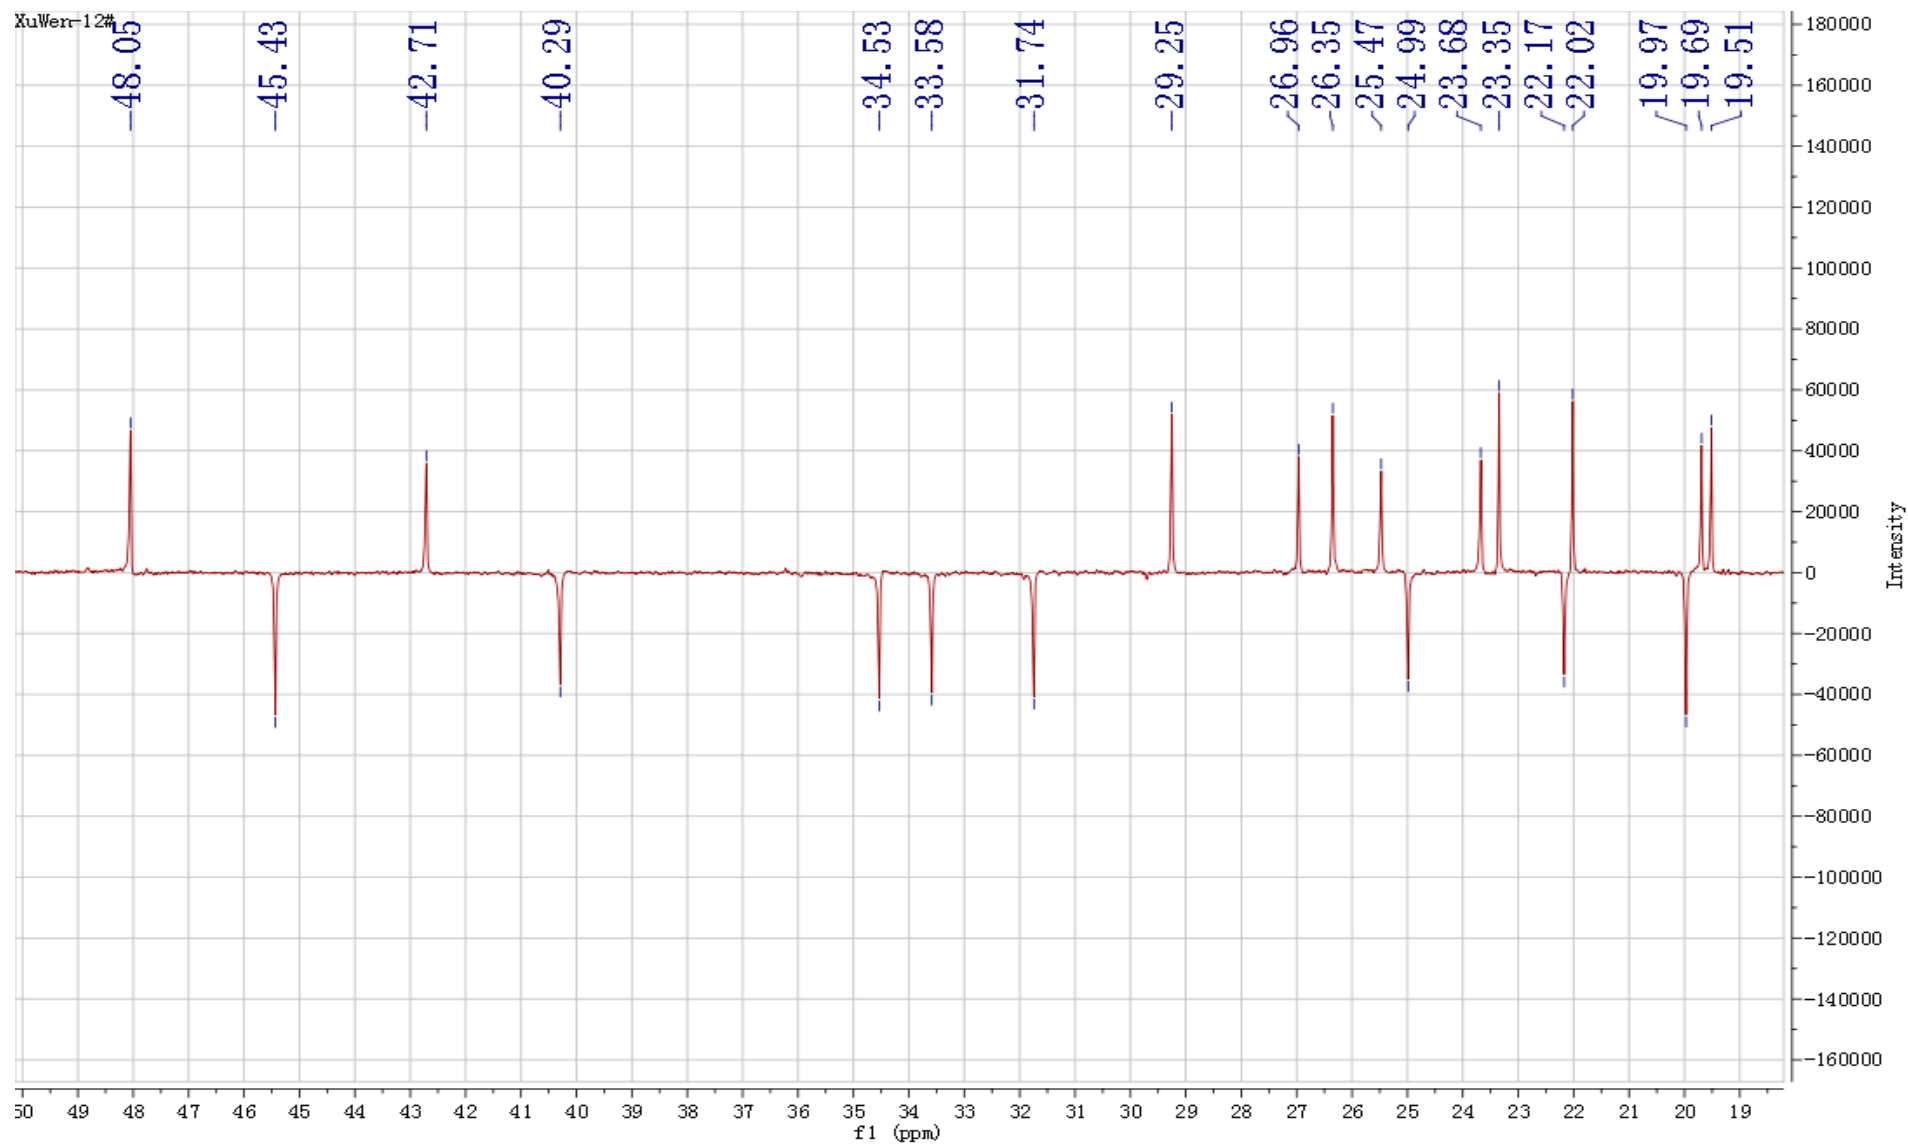

**Figure S7.**  $^{13}\text{C}$ -NMR DEPT of 16-oxo-11-deoxy-alisol A—Expansion.
